# Supplementary material
Source: MDPI journal article supplement (https://www.mdpi.com/1911-8074/14/9/430)
Supplement: s1 [file s1]

Archive with 2 entries (2 files):
- supplementary file S1- Beneficiaries survey.pdf
- supplementary file S2 - Business survey.pdf
